# Supplementary material for: End-to-End Pseudonymization of Fine-Tuned Clinical BERT Models
Source: Research Square preprint supplement (doi:10.21203/rs.3.rs-3302707/v1), 2023-09-13
Supplement: Supplementary file 1 [file bc7ab19a9e16c3e27a9dc7d4.pdf]

## Appendix A All Significant Results

Table 6 in Section 4 only included the statistically relevant results relevant to the analysis and discussion. Table A1 lists *all 24* statistically significant results obtained from the 150 comparisons that were made.

| Task               | Weaker model |   | Stronger model |   | p-value |
|--------------------|--------------|---|----------------|---|---------|
|                    | P            | F | P              | F |         |
| ICD-10             | ✗            | ✓ | ✗              | ✗ | 0.0378  |
| Factuality NER     | ✗            | ✓ | ✗              | ✗ | 0.0014  |
| ICD-10             | ✗            | ✓ | ✓              | ✓ | 0.0014  |
| Clinical NER       | ✗            | ✓ | ✓              | ✓ | 0.0070  |
| ICD-10             | ✗            | ✓ | ✓              | + | 0.0002  |
| Clinical NER       | ✗            | ✓ | ✓              | + | 0.0320  |
| Factuality NER     | ✗            | ✓ | ✓              | + | 0.0002  |
| ICD-10             | ✗            | ✓ | ✓              | ✗ | 0.0007  |
| Clinical NER       | ✗            | ✓ | ✓              | ✗ | 0.0029  |
| Factuality NER     | ✗            | ✓ | ✓              | ✗ | 0.0005  |
| Clinical NER       | ✗            | + | ✗              | ✗ | 0.0269  |
| ICD-10             | ✗            | + | ✓              | ✓ | 0.0057  |
| ADE Classification | ✗            | + | ✓              | ✓ | 0.0320  |
| Clinical NER       | ✗            | + | ✓              | ✓ | 0.0029  |
| ICD-10             | ✗            | + | ✓              | + | 0.0006  |
| ADE Classification | ✗            | + | ✓              | + | 0.0481  |
| Clinical NER       | ✗            | + | ✓              | + | 0.0129  |
| Factuality NER     | ✗            | + | ✓              | + | 0.0188  |
| ICD-10             | ✗            | + | ✓              | ✗ | 0.0011  |
| Clinical NER       | ✗            | + | ✓              | ✗ | 0.0023  |
| Factuality NER     | ✗            | + | ✓              | ✗ | 0.0156  |
| ADE Classification | ✗            | ✗ | ✓              | ✓ | 0.0078  |
| ICD-10             | ✗            | ✗ | ✓              | ✗ | 0.0086  |
| Clinical NER       | ✗            | ✗ | ✓              | ✗ | 0.0226  |

**Table A1** All 24 statistically significant results are listed alongside the task, the model configurations and the *p-values*. Similarly to Table ?? and Table ??, **P** denotes whether pre-training was done using pseudonymized data, and **F** if fine-tuning was done using pseudonymized data. As in the previously mentioned tables, a ✗ denotes that no pseudonymization was done, a ✓ that it was done using the *pseudo* model and a + means that pseudonymization was performed using the *pseudo+* model.
